# Supplementary material for: Metabolic potential of a single cell belonging to one of the most abundant lineages in freshwater bacterioplankton
Source: Oxford University Press journal article supplement (doi:10.1038/ismej.2012.86), 2012-07-19
Supplement: 41396_2013_bfismej201286_moesm62_esm.doc [file 41396_2013_bfismej201286_moesm62_esm.doc]

Supplementary Figures

Figure S1. Carbohydrate active enzymes in the acIB1 AAA027-L06 SAG. A. Proportion of carbohydrate active enzymes in the SAG. B. Frequency of glycoside hydrolases in the SAG compared to other major phyla.


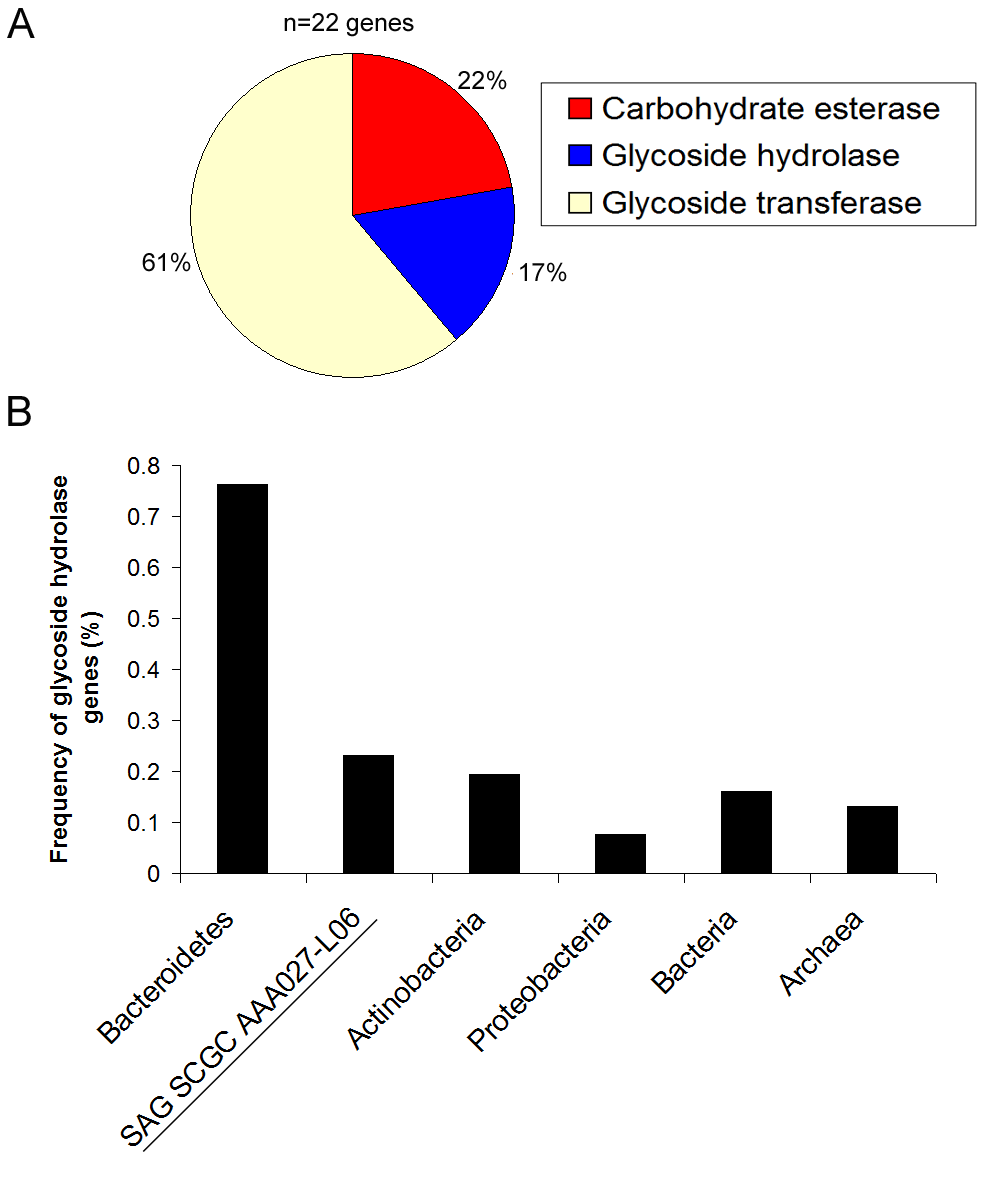


Figure S2. Identification of a putative chitinase-like protein in the acIB1 AAA027-L06 SAG. Active site and the putative catalytic residues described for the protein family in EXPASy (InterPro), CAZy and Pfam databases as well as the signal peptide at the N-terminus.


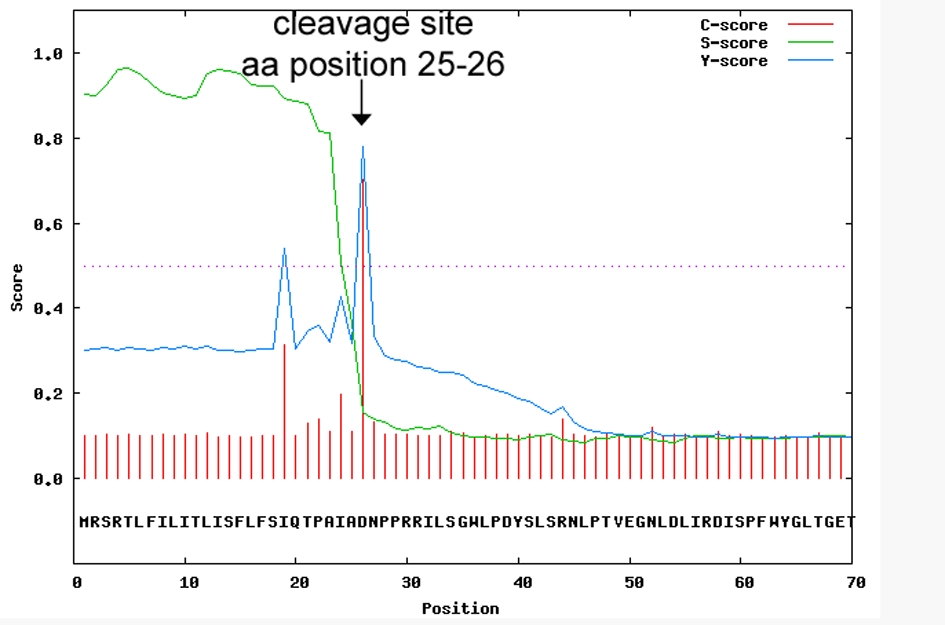


Supplementary Tables

Table S1. Finished Actinobacteria genomes included in the core gene analysis.

| **Genome Name** | **GenBank Project ID** | **Genome Size** | **Gene Count** |
| --- | --- | --- | --- |
| **Acidimicrobium ferrooxidans ICP, DSM 10331** | 29525 | 2158157 | 2092 |
| **Acidothermus cellulolyticus 11B** | 16097 | 2443540 | 2229 |
| **Actinosynnema mirum 101, DSM 43827** | 19705 | 8248144 | 7176 |
| **Amycolatopsis mediterranei U32** | 46889 | 10236715 | 9292 |
| **Arcanobacterium haemolyticum CCM, DSM 20595** | 37925 | 1986154 | 1885 |
| **Arthrobacter arilaitensis re117, CIP108037** | 50353 | 3918192 | 3518 |
| **Arthrobacter aurescens TC1** | 12512 | 5226648 | 4793 |
| **Arthrobacter chlorophenolicus A6** | 20011 | 4980870 | 4744 |
| **Arthrobacter phenanthrenivorans Sphe3** | 20087 | 4535320 | 4288 |
| **Arthrobacter phenanthrenivorans Sphe3** | 20087 | 4535320 | 4273 |
| **Arthrobacter sp. FB24** | 12640 | 5070478 | 4622 |
| **Atopobium parvulum IPP 1246, DSM 20469** | 29401 | 1543805 | 1422 |
| **Beutenbergia cavernae HKI 0122, DSM 12333** | 20827 | 4669183 | 4278 |
| **Bifidobacterium adolescentis ATCC 15703** | 16321 | 2089645 | 1709 |
| **Bifidobacterium animalis lactis AD011** | 19423 | 1933695 | 1587 |
| **Bifidobacterium animalis lactis BB-12** | 42883 | 1942198 | 1706 |
| **Bifidobacterium animalis lactis Bl-04, ATCC SD5219** | 32897 | 1938709 | 1631 |
| **Bifidobacterium animalis lactis DSM 10140** | 32893 | 1938481 | 1629 |
| **Bifidobacterium animalis lactis V9** | 32515 | 1944050 | 1636 |
| **Bifidobacterium bifidum PRL2010** | 42863 | 2214656 | 1767 |
| **Bifidobacterium bifidum S17** | 51963 | 2186882 | 1845 |
| **Bifidobacterium dentium Bd1** | 17583 | 2636367 | 2197 |
| **Bifidobacterium longum DJO10A** | 18773 | 2389526 | 2074 |
| **Bifidobacterium longum NCC2705** | 328 | 2260266 | 1805 |
| **Bifidobacterium longum infantis 157F-NC** | 32051 | 2408831 | 2070 |
| **Bifidobacterium longum infantis ATCC 15697** | 17189 | 2832748 | 2577 |
| **Bifidobacterium longum infantis JCM 1217** | 32047 | 2385164 | 2009 |
| **Bifidobacterium longum longum BBMN68** | 53143 | 2265943 | 1870 |
| **Bifidobacterium longum longum F8** | 45963 | 2384987 | 1744 |
| **Bifidobacterium longum longum JDM301** | 47579 | 2477838 | 2022 |
| **Brachybacterium faecium 6-10, DSM 4810** | 17026 | 3614992 | 3189 |
| **Catenulispora acidiphila ID139908, DSM 44928** | 21085 | 10467782 | 9125 |
| **Cellulomonas flavigena 134, DSM 20109** | 19707 | 4123179 | 3783 |
| **Cellvibrio gilvus ATCC 13127** | -1 | 3526441 | 3262 |
| **Clavibacter michiganensis michiganensis NCPPB 382** | 19643 | 3395237 | 3169 |
| **Clavibacter michiganensis sepedonicus ATCC 33113** | 184 | 3403786 | 3168 |
| **Conexibacter woesei DSM 14684** | 20745 | 6359369 | 6001 |
| **Coriobacterium glomerans PW2, DSM 20642** | -1 | 2115681 | 1858 |
| **Corynebacterium aurimucosum CN-1, ATCC 700975** | 37279 | 2819226 | 2617 |
| **Corynebacterium diphtheriae gravis NCTC 13129** | 87 | 2488635 | 2395 |
| **Corynebacterium efficiens YS-314** | 305 | 3219505 | 3064 |
| **Corynebacterium glutamicum Kalinowski ATCC 13032** | 13760 | 3282708 | 3154 |
| **Corynebacterium glutamicum Nakagawa ATCC 13032** | 307 | 3309401 | 3032 |
| **Corynebacterium glutamicum R** | 19193 | 3363299 | 3174 |
| **Corynebacterium jeikeium K411** | 13967 | 2476822 | 2186 |
| **Corynebacterium kroppenstedtii DSM 44385** | 38011 | 2446804 | 2073 |
| **Corynebacterium pseudotuberculosis 1002** | 40687 | 2335112 | 2117 |
| **Corynebacterium pseudotuberculosis C231** | 40875 | 2328208 | 2113 |
| **Corynebacterium pseudotuberculosis FRC41** | 48979 | 2337913 | 2171 |
| **Corynebacterium pseudotuberculosis I19** | 52845 | 2337730 | 2127 |
| **Corynebacterium urealyticum DSM 7109** | 29211 | 2369219 | 2084 |
| **Cryptobacterium curtum 12-3, DSM 15641** | 20739 | 1617804 | 1421 |
| **Eggerthella lenta VPI 0255, DSM 2243** | 21093 | 3632260 | 3184 |
| **Frankia alni ACN14a** | 17403 | 7497934 | 6795 |
| **Frankia sp. CcI3** | 13963 | 5433628 | 4621 |
| **Frankia sp. EAN1pec** | 13915 | 8982042 | 7250 |
| **Frankia sp. EUN1f** | -1 | 9322173 | 7833 |
| **Frankia sp. EuI1c** | 37913 | 8815781 | 7262 |
| **Frankia sp. EuI1c** | -1 | 8815781 | 7264 |
| **Gardnerella vaginalis 317, ATCC 14019** | 31473 | 1667350 | 1420 |
| **Gardnerella vaginalis 409-05** | 31001 | 1617544 | 1312 |
| **Geodermatophilus obscurus DSM 43160** | 29547 | 5322497 | 5155 |
| **Gordonia bronchialis DSM 43247** | 29549 | 5290012 | 5002 |
| **Gordonibacter pamelaeae 7-10-1-bT, DSM 19378** | 39175 | 3608022 | 2077 |
| **Intrasporangium calvum 7KIP, DSM 43043** | 43527 | 4024382 | 3710 |
| **Isoptericola variabilis 225** | -1 | 3307740 | 3080 |
| **Isoptericola variabilis 225** | -1 | 3307740 | 3080 |
| **Jonesia denitrificans 55134, DSM 20603** | 20833 | 2749646 | 2635 |
| **Kineococcus radiotolerans SRS30216** | 10689 | 4956672 | 4785 |
| **Kocuria rhizophila DC2201** | 27833 | 2697540 | 2413 |
| **Kribbella flavida DSM 17836** | 21089 | 7579488 | 7149 |
| **Kytococcus sedentarius 541, DSM 20547** | 21067 | 2785024 | 2692 |
| **Leifsonia xyli xyli CTCB07** | 212 | 2584158 | 2358 |
| **Micrococcus luteus Fleming NCTC 2665** | 20655 | 2501097 | 2342 |
| **Micromonospora aurantiaca ATCC 27029** | 37957 | 7025559 | 6360 |
| **Micromonospora sp. L5** | 38291 | 6962533 | 6326 |
| **Mobiluncus curtisii ATCC 43063** | 31519 | 2146480 | 1965 |
| **Mycobacterium abscessus CIP 104536** | 15691 | 5090491 | 4991 |
| **Mycobacterium avium 104** | 88 | 5475491 | 5305 |
| **Mycobacterium avium paratuberculosis K-10** | 91 | 4829781 | 4415 |
| **Mycobacterium bovis AF2122/97** | 89 | 4345492 | 4014 |
| **Mycobacterium bovis BCG Pasteur 1173P2** | 18059 | 4374522 | 4048 |
| **Mycobacterium bovis BCG Tokyo 172** | 31211 | 4371711 | 3996 |
| **Mycobacterium gilvum PYR-GCK** | 15760 | 5982829 | 5683 |
| **Mycobacterium gilvum Spyr1** | 28521 | 5783292 | 5434 |
| **Mycobacterium leprae Br4923** | 31271 | 3268071 | 1654 |
| **Mycobacterium leprae TN** | 90 | 3268203 | 2750 |
| **Mycobacterium marinum M, ATCC BAA-535** | 16725 | 6660144 | 5501 |
| **Mycobacterium rhodesiae NBB3** | -1 | 6415739 | 6342 |
| **Mycobacterium smegmatis MC2 155** | 92 | 6988209 | 6941 |
| **Mycobacterium sp. JLS** | 16079 | 6048425 | 5855 |
| **Mycobacterium sp. KMS** | 16081 | 6256079 | 6089 |
| **Mycobacterium sp. MCS** | 15762 | 5920523 | 5704 |
| **Mycobacterium tuberculosis CDC1551** | 223 | 4403706 | 4300 |
| **Mycobacterium tuberculosis F11 (ExPEC)** | 15642 | 4424435 | 4019 |
| **Mycobacterium tuberculosis H37Ra** | 18883 | 4419977 | 4099 |
| **Mycobacterium tuberculosis H37Rv (lab strain)** | 224 | 4411532 | 4062 |
| **Mycobacterium tuberculosis KZN 1435 (MDR)** | 21055 | 4398250 | 4107 |
| **Mycobacterium ulcerans Agy99** | 16230 | 5805761 | 4306 |
| **Mycobacterium vanbaalenii PYR-1** | 15761 | 6491865 | 6047 |
| **Nakamurella multipartita Y-104, DSM 44233** | 29537 | 6060298 | 5471 |
| **Nocardia farcinica IFM 10152** | 13117 | 6292344 | 6011 |
| **Nocardioides sp. JS614** | 12738 | 5293685 | 4975 |
| **Nocardiopsis dassonvillei dassonvillei DSM 43111** | 19709 | 6543312 | 5647 |
| **Olsenella uli VPI, DSM 7084** | 36641 | 2051896 | 1841 |
| **Propionibacterium acnes KPA171202** | 12460 | 2560265 | 2385 |
| **Propionibacterium acnes SK137** | 31005 | 2495334 | 2408 |
| **Propionibacterium freudenreichii shermanii CIRM-BIA1** | 46291 | 2616384 | 2426 |
| **Renibacterium salmoninarum ATCC 33209** | 19227 | 3155250 | 3558 |
| **Rhodococcus equi 103S** | 41335 | 5043170 | 4570 |
| **Rhodococcus erythropolis PR4** | 20395 | 6895538 | 6505 |
| **Rhodococcus jostii RHA1** | 13693 | 9702737 | 9242 |
| **Rhodococcus opacus B4** | 34839 | 8834939 | 8259 |
| **Rothia dentocariosa ATCC 17931** | 48447 | 2506025 | 2281 |
| **Rothia mucilaginosa DY-18** | 38547 | 2264603 | 1965 |
| **Rubrobacter radiotolerans DSM 5868** | -1 | 3398074 | 3317 |
| **Rubrobacter xylanophilus DSM 9941** | 10670 | 3225748 | 3283 |
| **Saccharomonospora viridis P101, DSM 43017** | 20835 | 4308349 | 3962 |
| **Saccharopolyspora erythraea NRRL 2338 white** | 18489 | 8212805 | 7290 |
| **Salinispora arenicola CNS-205** | 17109 | 5786361 | 5169 |
| **Salinispora tropica CNB-440** | 16342 | 5183331 | 4664 |
| **Sanguibacter keddieii ST-74, DSM 10542** | 19711 | 4253413 | 3800 |
| **Segniliparus rotundus CDC 1076, DSM 44985** | 37711 | 3157527 | 3126 |
| **Slackia heliotrinireducens RHS 1, DSM 20476** | 20831 | 3165038 | 2852 |
| **Stackebrandtia nassauensis LLR-40K-21, DSM 44728** | 19713 | 6841557 | 6541 |
| **Streptomyces avermitilis MA-4680** | 189 | 9119895 | 7792 |
| **Streptomyces bingchenggensis BCW-1** | 46847 | 11936683 | 10106 |
| **Streptomyces coelicolor A3(2)** | 242 | 9054847 | 8325 |
| **Streptomyces griseus griseus NBRC 13350** | 20085 | 8545929 | 7222 |
| **Streptomyces scabiei 87.22** | 40749 | 10148695 | 8841 |
| **Streptosporangium roseum DSM 43021** | 21083 | 10369518 | 9510 |
| **Thermobifida fusca YX** | 94 | 3642249 | 3195 |
| **Thermobispora bispora R51, DSM 43833** | 20737 | 4189976 | 3661 |
| **Thermomonospora curvata DSM 43183** | 20825 | 5639016 | 5061 |
| **Tropheryma whipplei TW08/27** | 354 | 925938 | 840 |
| **Tropheryma whipplei Twist** | 95 | 927303 | 864 |
| **Tsukamurella paurometabola 33, DSM 20162** | 29399 | 4479724 | 4391 |
| **Xylanimonas cellulosilytica DSM 15894** | 19715 | 3831380 | 3549 |

Table S2. Transporters identified in the acI-B1 single amplified genome (SAG).

| **Substrate** | **Type of transporter** | **Locus Tag** |
| --- | --- | --- |
| **amino acid** | Amino acid transport protein (AzlD) | A27L6_0022.00000110 |
| **amino acid** | Amino Acid-Polyamine-Organocation (APC) Family | A27L6_0037.00000270, A27L6_0025.00000140 |
| **ammonium** | permease | A27L6_0007.00000350 |
| **arabinose** | Major facilitator superfamily | A27L6_0016.00000070, A27L6_0025.00000220, A27L6_0027.00000540, A27L6_0004.00000020, A27L6_0007.00000370, A27L6_0007.00000390 |
| **branched-chain amino acid** | ABC-type | A27L6_0028.00000350, A27L6_0017.00000270, A27L6_0028.00000330, A27L6_0017.00000250, A27L6_0017.00000260, A27L6_0028.00000320, A27L6_0028.00000360, A27L6_0005.00000010, A27L6_0028.00000340, A27L6_0017.00000280 |
| **branched-chain amino acid** | permease | A27L6_0022.00000120 |
| **cobalt/nickel** | ABC-type | A27L6_0054.00000120, A27L6_0054.00000090, A27L6_0054.00000100 |
| **copper** | P-type ATPase superfamily | A27L6_0007.00000090 |
| **DNA** | binding Rossmann-fold domains | A27L6_0034.00000210 |
| **D-ribose** | ABC-type | A27L6_0001.00000670, A27L6_0001.00000690, A27L6_0001.00000700 |
| **D-xylose** | ABC-type | A27L6_0003.00000050, A27L6_0003.00000060, A27L6_0003.00000040 |
| **Fe2+/Pb2+** | permease | A27L6_0044.00000160 |
| **Fe2+/Zn2+** | uptake regulation proteins | A27L6_0027.00000420 |
| **Fe-S cluster** | ABC-type | A27L6_0020.00000080, A27L6_0020.00000100, A27L6_0020.00000110 |
| **glycerol** | Aquaporin | A27L6_0050.00000080 |
| **iron complex** | ABC-type | A27L6_0010.00000070 |
| **iron(III)** | ABC-type | A27L6_0023.00000190, A27L6_0023.00000180, |
| **lipopolysaccharide** | ABC-type | A27L6_0001.00000590, A27L6_0001.00000600 |
| **Mg/Co/Ni** | CBS-domain | A27L6_0001.00000250 |
| **multidrug** | ABC-type | A27L6_0020.00000040, A27L6_0007.00000360, A27L6_0011.00000380, A27L6_0005.00000160 |
| **multidrug** | EamA-like transporter family | A27L6_0008.00000400, A27L6_0025.00000410, A27L6_0036.00000150, A27L6_0037.00000310 |
| **multidrug** | efflux transporter EmrE | A27L6_0004.00000060, A27L6_0011.00000350, A27L6_0001.00000260 |
| **multiple antibiotic transporter** | MarC family | A27L6_0008.00000260 |
| **nicotinamide** | mononucleotide transporter | A27L6_0034.00000090, A27L6_0005.00000610 |
| **peptide/nickel** | ABC-type | A27L6_0051.00000060, A27L6_0051.00000080, A27L6_0051.00000050, A27L6_0051.00000070, A27L6_0051.00000090 |
| **phosphate** | ABC-type | A27L6_0017.00000050, A27L6_0017.00000040, A27L6_0017.00000060, A27L6_0017.00000070 |
| **phosphate** | transport system regulatory protein PhoU | A27L6_0052.00000100 |
| **potassium** | binding Rossmann-fold domains | A27L6_0044.00000230, A27L6_0044.00000220 |
| **potassium** | NAD-binding component | A27L6_0002.00000080, A27L6_0003.00000010 |
| **purine-cytosine** | permease | A27L6_0011.00000310 |
| **simple sugar: ribose/xylose/arabinose/galactoside** | ABC-type | A27L6_0004.00000170, A27L6_0060.00000010, A27L6_0004.00000180, A27L6_0004.00000190 |
| **sodium** | ion channel | A27L6_0010.00000120 |
| **sodium** | ion symporter | A27L6_0004.00000140 |
| **sodium** | proton-translocating | A27L6_0012.00000080 |
| **spermidine/putrescine** | ABC-type | A27L6_0027.00000180, A27L6_0023.00000130, A27L6_0027.00000190, A27L6_0023.00000120, A27L6_0027.00000160, A27L6_0023.00000140, A27L6_0023.00000170 |
| **unknown** | ABC-type | A27L6_0017.00000130 |
| **unknown** | ABC-type | A27L6_0011.00000720 |
| **unknown** | ABC-type | A27L6_0067.00000010 |
| **unknown** | ABC-type | A27L6_0032.00000130, A27L6_0032.00000120 |
| **unknown** | ABC-type | A27L6_0017.00000010, A27L6_0016.00000090, A27L6_0035.00000020 |
| **unknown** | ABC-type | A27L6_0001.00000710 |
| **unknown** | ABC-type | A27L6_0032.00000110 |
| **unknown** | ABC-type | A27L6_0060.00000020 |
| **unknown** | ABC-type | A27L6_0033.00000010, A27L6_0033.00000040 |
| **unknown** | ABC-type | A27L6_0007.00000350 |
| **unknown** | efflux transporter EmrE | A27L6_0039.00000030 |
| **unknown** | efflux transporter EmrE | A27L6_0011.00000350 |
| **unknown** | efflux transporter EmrE | A27L6_0001.00000260 |
| **unknown** | efflux transporter EmrE | A27L6_0056.00000060 |
| **unknown** | efflux transporter EmrE | A27L6_0034.00000130 |
| **unknown** | efflux transporter EmrE | A27L6_0034.00000190 |
| **unknown** | efflux transporter EmrE | A27L6_0004.00000110 |
| **unknown** | ion channel | A27L6_0016.00000040 |
| **unknown** | Major facilitator superfamily | A27L6_0049.00000100, A27L6_0017.00000100 |
| **unknown** | permease | A27L6_0010.00000090 |
| **unknown** | permease | A27L6_0005.00000030 |
| **unknown** | permease | A27L6_0050.00000090 |
| **unknown** | permease | A27L6_0023.00000040 |
| **unknown** | permease | A27L6_0003.00000230 |
| **xanthine/uracil** | permease | A27L6_0019.00000290 |
| **zinc** | ZIP family | A27L6_0027.00000410 |

Table S3. Genes encoding putative glycoside hydrolases in the acI-B1

| **Locus Tag** | **aCAZy family** | **bPutative Protein** | **Closest Hit**  **(cBLASTP)** | **bActive site** | **Putative Function** |
| --- | --- | --- | --- | --- | --- |
| A27L6_0005.00000540 | GH18 | Chitinase-like family (Pfam [PF00704](http://pfam.sanger.ac.uk/family/PF00704); EC [3.2.1.14](http://enzyme.expasy.org/EC/3.2.1.14)) | (7e-37), glycoside hydrolase *Acidothermus cellulolyticus* ([YP_872184](http://www.ncbi.nlm.nih.gov/protein/117927633?report=genbank&log$=prottop&blast_rank=1&RID=KW7BG3GN013)) | aa positions  138-146 d(YDGIDLDfE) | Hydrolysis of chitin |
| A27L6_0027.00000320 | GH25 | Lysozyme (Pfam 01183, EC [3.2.1.17](http://www.enzyme-database.org/query.php?ec=3.2.1.17)) | (1e-22),lysoszyme *Rhodococcus opacus*  ([YP_002780510](http://www.ncbi.nlm.nih.gov/protein/226362732?report=genbank&log$=prottop&blast_rank=1&RID=KW8XXF9E012)) | aa positions  150(D), 177(K), 210(Y), 212(F),255(D),257(E),300(Y),322(W),363(Q),381(D) | Hydrolysis of peptidoglycan |
| A27L6_0004.00000250 | GH88 | β-glucuronyl hydrolase (Pfam [PF07470](http://pseudofam.pseudogene.org/pages/psfam/showFams.jsf?genome=0&format=family&id=PF07470), EC [3.2.1.-](http://www.enzyme-database.org/query.php?ec=3.2.1.*)) | (7e-74), glycosyl hydrolase family 88 *Vibrio nigripulchritudo* ([ZP_08730722](http://www.ncbi.nlm.nih.gov/protein/343492352?report=genbank&log$=prottop&blast_rank=1&RID=KWA24F62016)) | Not well known | Hydrolytic release of unsaturated glucuronic acids from oligosaccharides |

aCarbohydrate active enzymes database (Cantarel et al. 2009), www.cazy.org

bDetermined by using CAZy database, CAZymes Analysis Toolkit (Parker et al., 2010), Conserved Domain BLAST (Marchler-Bauer et al., 2010), EXPAsy- Prosite-Swiss Model Databases (Kiefer et al., 2009; Sigrist et al. 2010)

cBLASTP was conducted against the non redundant database. E-value is indicated (brackets).

dThe underlined E (Glu) is the catalytic residue

Table S4. Genes identified involved in the synthesis of ß-carotene in the acIB1 AAA027-L06 SAG.

| **Peptide** | **Locus Tag** |
| --- | --- |
| 4-hydroxy-3-methylbut-2-enyl diphosphate reductase (ispH) | A27L6_0007.00000260 |
| Geranylgeranyl diphosphate synthase (ctrE) | A27L6_0034.00000040 |
| Phytoene/squalene synthetase (ctrB) | A27L6_0034.00000060 |
| Phytoene desaturase (ctrI) | A27L6_0050.00000010 |
| Aromatic ring-cleaving dioxygenase (requires further characterization) | A27L6_0025.00000120 |

Table S5. Genes coding for replication, repair and recombination mechanisms in the acIB1 AAA027-L06 SAG.

| Gene Name | Locus Tag | Protein description |
| --- | --- | --- |
| **xpb** | A27L6_0011.00000630 | DNA or RNA helicases of superfamily II |
| **xni** | A27L6_0018.00000010, A27L6_0063.00000010 | 5''-3'' exonuclease (including N-terminal domain of PolI) |
| **xerD** | A27L6_0019.00000120 | Site-specific recombinase |
| **xerC** | A27L6_0023.00000280 | Site-specific recombinase |
| **uvrD** | A27L6_0070.00000010, A27L6_0031.00000010, A27L6_0032.00000010, A27L6_0007.00000170, A27L6_0007.00000200 | Superfamily I DNA and RNA helicases |
| **uvrC** | A27L6_0038.00000010, A27L6_0021.00000070 | Nuclease subunit of the excinuclease complex |
| **uvrB** | A27L6_0038.00000030 | Helicase subunit of the DNA excision repair complex |
| **uvrA** | A27L6_0038.00000020 | excinuclease ABC subunit A |
| **topA** | A27L6_0011.00000260 | DNA topoisomerase I |
| **tatD** | A27L6_0059.00000010 | DNase family protein |
| **ssb** | A27L6_0049.00000050 | Single-stranded DNA-binding protein |
| **ruvC** | A27L6_0008.00000610 | crossover junction endodeoxyribonuclease; recombination |
| **ruvB** | A27L6_0008.00000630 | holliday junction DNA helicase; recombination |
| **ruvA** | A27L6_0008.00000620 | holliday junction DNA helicase; recombination |
| **rnhB** | A27L6_0034.00000220 | ribonuclease HII |
| **recR** | A27L6_0025.00000100 | Recombinational DNA repair protein |
| **recO** | A27L6_0027.00000450 | Recombinational DNA repair protein |
| **recN** | A27L6_0019.00000140 | ATPase involved in DNA repair |
| **recG** | A27L6_0034.00000370 | ATP-dependent DNA helicase |
| **recF** | A27L6_0011.00000130 | Recombinational DNA repair ATPase |
| **recA** | A27L6_0045.00000070 | recombinase |
| **radA** | A27L6_0011.00000560 | DNA repair protein |
| **priA** | A27L6_0009.00000320, A27L6_0010.00000010, A27L6_0008.00000650 | replication restart DNA helicase |
| **polA** | A27L6_0038.00000060 | DNA polymerase I |
| **phrA** | A27L6_0010.00000070 | DNA photolyase |
| **parA** | A27L6_0019.00000100, A27L6_0001.00000230 | ATPases involved in chromosome partitioning |
| **ogt** | A27L6_0034.00000150 | methylated-DNA-[protein]-cysteine S-methyltransferase |
| **nth** | A27L6_0024.00000180 | endonuclease III |
| **nfo** | A27L6_0034.00000120 | deoxyribonuclease IV |
| **mutM** | A27L6_0034.00000300 | formamidopyrimidine-DNA glycosylase |
| **mfd** | A27L6_0007.00000470 | Transcription-repair coupling factor |
| **merR** | A27L6_0024.00000080 | Predicted site-specific integrase-resolvase |
| **ligA** | A27L6_0027.00000070 | NAD-dependent DNA ligase |
| **hupB** | A27L6_0034.00000450 | Bacterial nucleoid DNA-binding protein |
| **holB** | A27L6_0011.00000280 | DNA polymerase III subunit delta |
| **gyrB** | A27L6_0035.00000030, A27L6_0011.00000150 | DNA gyrase subunit B |
| **gyrA** | A27L6_0035.00000010, A27L6_0011.00000160, A27L6_0044.00000360 | DNA gyrase subunit A |
| **dnaX** | A27L6_0025.00000110 | DNA polymerase III, gamma |
| **dnaQ** | A27L6_0008.00000250 | DNA polymerase III, alpha subunit (gram-positive type) |
| **dnaN** | A27L6_0011.00000120 | DNA polymerase III subunit beta |
| **dnaG** | A27L6_0027.00000350 | DNA primase |
| **dnaE** | A27L6_0038.00000220, A27L6_0037.00000010, A27L6_0058.00000040 | DNA polymerase III, alpha subunit |
| **dnaB** | A27L6_0049.00000020 | Replicative DNA helicase |
| **dnaA** | A27L6_0011.00000110 | chromosomal replication initiator protein |
| **dnaA** | A27L6_0011.00000110 | ATPase involved in DNA replication initiation |
| **dinG** | A27L6_0036.00000070 | ATP-dependent DNA helicase |
| **dinB** | A27L6_0050.00000110 | DNA polymerase involved in DNA repair |
| **cinA** | A27L6_0047.00000020, A27L6_0046.00000020 | competence/damage-inducible protein |
|  | A27L6_0004.00000090 | Predicted DNA alkylation repair enzyme |
|  | A27L6_0010.00000080 | Uracil DNA glycosylase |
|  | A27L6_0011.00000300 | Superfamily II DNA and RNA helicases |
|  | A27L6_0025.00000360, A27L6_0034.00000110 | Serine/threonine protein kinase |
|  | A27L6_0003.00000080 | Ribonuclease HI |
|  | A27L6_0034.00000210 | Predicted Rossmann fold nucleotide-binding protein involved in DNA uptake |
|  | A27L6_0034.00000360 | N6-adenine-specific methylase |
|  | A27L6_0069.00000010, A27L6_0007.00000210 | Helicase |
|  | A27L6_0007.00000180 | NTP pyrophosphohydrolases containing a Zn-finger, probably nucleic-acid-binding |
|  | A27L6_0009.00000100 | Predicted endonuclease involved in recombination |

Table S6. Stress related genes in the acIB1 AAA027-L06 SAG

| **Pathway/protein (copy number greater than one)** | **Type of stress** | **Locus Tag** |
| --- | --- | --- |
| Cold shock proteins | Cryoprotection | A27L6_0027.00000140 |
| Predicted membrane GTPase involved in stress response | Cryoprotection | A27L6_0007.00000220 |
| ABC-type multidrug transport system, ATPase and permease components | Drugs | A27L6_0020.00000040 |
| ABC-type multidrug transport system, ATPase component (3) | Drugs | A27L6_0007.00000360, A27L6_0011.00000380, A27L6_0005.00000160 |
| ABC-type multidrug transport system, permease component | Drugs | A27L6_0005.00000170 |
| Beta-lactamase class C and other penicillin binding proteins | Drugs | A27L6_0023.00000410 |
| Membrane transporters of cations and cationic drugs | Drugs | A27L6_0004.00000060 |
| Multiple antibiotic transporter | Drugs | A27L6_0008.00000260 |
| Penicillin tolerance protein | Drugs | A27L6_0007.00000260 |
| Permeases of the drug/metabolite transporter (DMT) superfamily (2) | Drugs | A27L6_0011.00000350, A27L6_0001.00000260 |
| Predicted drug exporters of the RND superfamily (2) | Drugs | A27L6_0053.00000050, A27L6_0003.00000240 |
| Predicted hydrolase of the metallo-beta-lactamase superfamily | Drugs | A27L6_0048.00000010 |
| TipAS antibiotic-recognition domain | Drugs | A27L6_0004.00000080 |
| DNA-directed RNA polymerase specialized sigma subunit, sigma24 homolog (4) | Heat schock | A27L6_0007.00000060, A27L6_0001.00000170, A27L6_0024.00000010, A27L6_0055.00000050 |
| Na+/H+ antiporter NhaD and related arsenite permeases | Internal pH regulation/Na+ extrusion | A27L6_0004.00000140 |
| Uncharacterized membrane protein, possible Na+ channel or pump | Internal pH regulation/Na+ extrusion | A27L6_0010.00000120 |
| Membrane protein TerC, possibly involved in tellurium resistance | Metal | A27L6_0001.00000610 |
| Predicted divalent heavy-metal cations transporter | Metal | A27L6_0027.00000410 |
| K+ transport systems, NAD-binding component (2) | Osmotic | A27L6_0044.00000230, A27L6_0044.00000220 |
| Kef-type K+ transport system, predicted NAD-binding component (2) | Osmotic | A27L6_0002.00000080, A27L6_0003.00000010 |
| Small-conductance mechanosensitive channel | Osmotic | A27L6_0016.00000040 |
| Aconitase A | Oxidative | A27L6_0044.00000200 |
| Conserved domain frequently associated with peptide methionine sulfoxide reductase | Oxidative | A27L6_0001.00000540 |
| Glutaredoxin and related proteins | Oxidative | A27L6_0022.00000100 |
| Glutaredoxin-like domain (DUF836) | Oxidative | A27L6_0011.00000620 |
| Leucyl aminopeptidase (2) | Oxidative | A27L6_0001.00000190, A27L6_0008.00000030 |
| Nickel-containing superoxide dismutase (2) | Oxidative | A27L6_0006.00000070, A27L6_0007.00000030 |
| Peptide methionine sulfoxide reductase | Oxidative | A27L6_0001.00000530 |
| Peroxiredoxin (2) | Oxidative | A27L6_0002.00000030, A27L6_0008.00000410 |
| Pyridoxine biosynthesis enzyme | Oxidative | A27L6_0008.00000580 |
| Thiol-disulfide isomerase and thioredoxins (2) | Oxidative | A27L6_0011.00000680, A27L6_0024.00000170 |
| Thioredoxin domain-containing protein (2) | Oxidative | A27L6_0049.00000160, A27L6_0005.00000020 |
| Thioredoxin reductase | Oxidative | A27L6_0049.00000150 |
| Guanosine polyphosphate pyrophosphohydrolases/synthetases | Starvation | A27L6_0009.00000030 |
| Phosphate starvation-inducible protein PhoH, predicted ATPase | Starvation | A27L6_0034.00000530 |
| Predicted ATPase related to phosphate starvation-inducible protein PhoH | Starvation | A27L6_0007.00000290 |
| Ribosomal protein L25 (general stress protein Ctc) | Starvation/General stress | A27L6_0007.00000510 |

Table S7. Sporulation related genes identified in the acIB1 AAA027-L06 SAG.

| **Gene Name** | **Gene Definition** |
| --- | --- |
| PTH1, pth, *spo*VC | peptidyl-tRNA hydrolase, PTH1 family |
| *yid*C, *spo*IIIJ, OXA1 | preprotein translocase subunit YidC |
| *fts*K, spoIIIE | DNA segregation ATPase FtsK/SpoIIIE, S-DNA-T family |
| *par*B, *spo*0J | chromosome partitioning protein, ParB family |
| *fts*W, *spo*VE | cell division protein FtsW |
| *whi*B | Actinobacteria specific gene with controversial biochemical role |
